# Supplementary material
Source: publisher figshare collection journal article supplement (https://acs.figshare.com/ndownloader/files/10648018)
Supplement: Supplementary file 1 [file 10648018]

**Supporting Information of “Theoretical Studies on the Photophysics and Photochemistry of 5-Formylcytosine and 5-Carboxylcytosine: The Oxidative Products of Epigenetic Modification of Cytosine in DNA”**

Jinlu Xing,<sup>†,‡</sup> Yuejie Ai,<sup>\*,†</sup> Yang Liu,<sup>†</sup> Jia Du,<sup>‡</sup> Weiqiang Chen,<sup>†,‡</sup> Zhanhui Lu,<sup>\*,‡</sup> and Xiangke Wang<sup>\*,†,§,||</sup>

<sup>†</sup>College of Environmental Science and Engineering, North China Electric Power University, Beijing 102206, P. R. China

<sup>‡</sup>School of Mathematics and Physical Science, North China Electric Power University, Beijing 102206, P. R. China

<sup>§</sup>NAAM Research Group, Faculty of Science, King Abdulaziz University, Jeddah 21589, Saudi Arabia

<sup>||</sup>Collaborative Innovation Centre of Radiation Medicine of Jiangsu Higher Education Institutions, School for Radiological and Interdisciplinary Sciences, Soochow University, Suzhou 215123, P. R. China

E-mail: aiyuejie@ncepu.edu.cn (Yuejie Ai), luzhanhuilu@163.com (Zhanhui Lu), xkwang@ncepu.edu.cn (Xiangke Wang )

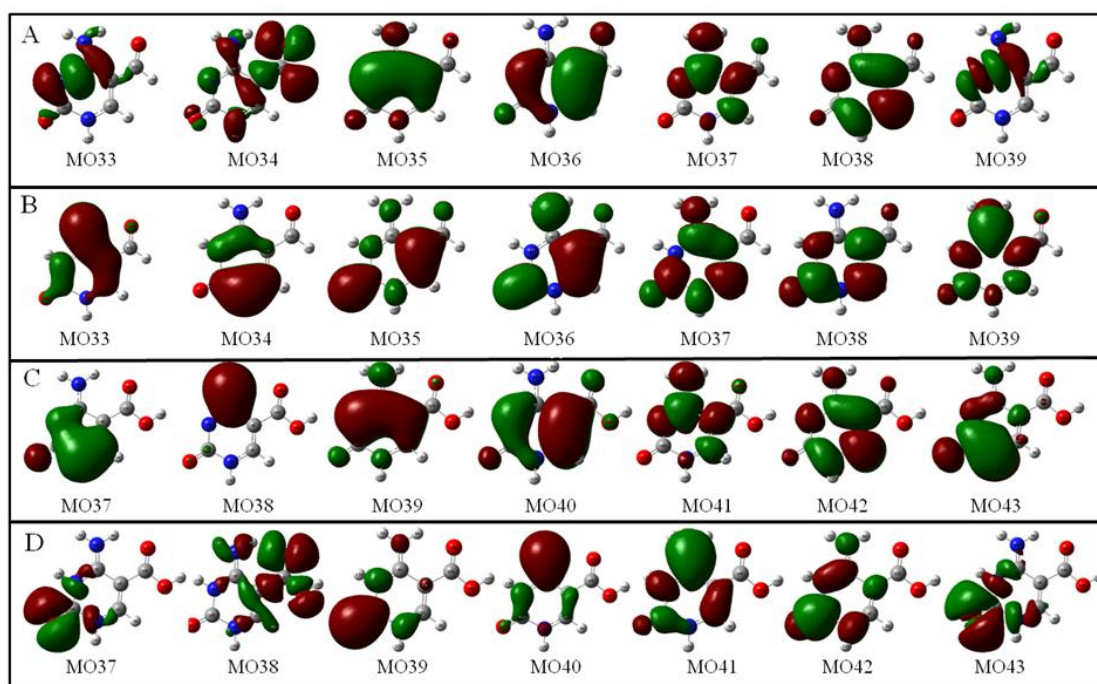

**Figure S1.** The active orbitals of 5fC and 5caC at CAS(8,7)/6-31G(d) level. A: 5fC-N, B: 5fC-P, C: 5caC-N and D: 5caC-P.

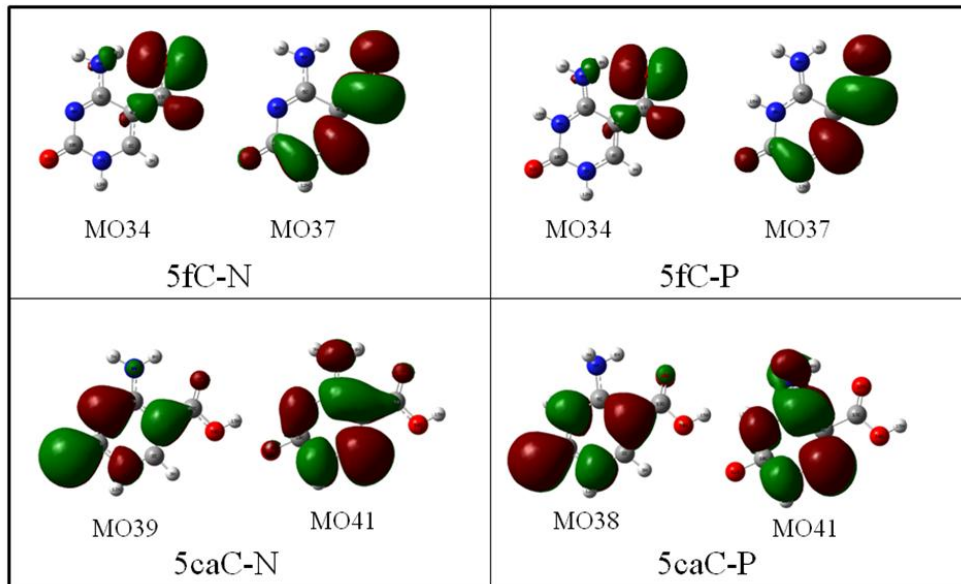

**Figure S2.** The transition molecular orbitals for  $S_1$  states of 5fC and 5caC at CAS(8,7)/6-31G(d) level.

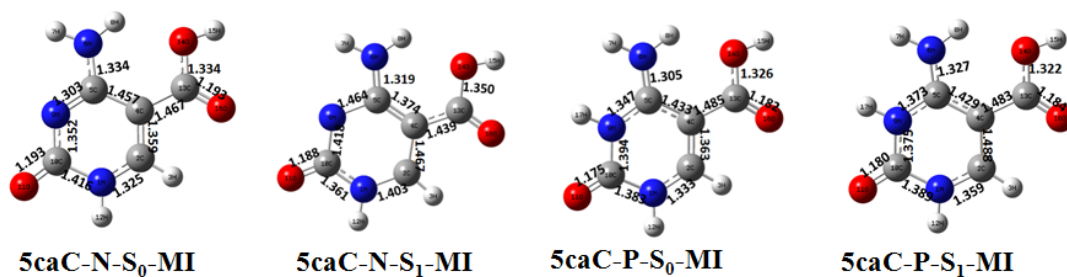

**Figure S3.** The structures of  $S_0$  and  $S_1$  states for intramolecular isomers of 5fC and 5caC at CAS(8,7)/6-31G(d) level. Bond lengths are in Å.

**Table S1.** The energies of  $S_0$  and  $S_1$  states of 5caC and the intramolecular heterogeneous states at CAS(8,7)/6-31G(d) level. Energies are in hartree.

|           | Neutral      | Protonated   |
|-----------|--------------|--------------|
| $S_0$     | -580.3114074 | -580.699423  |
| $S_1$     | -580.182135  | -580.484875  |
| $S_0$ -MI | -580.240971  | -580.6207141 |
| $S_1$ -MI | -580.1055007 | -580.458269  |

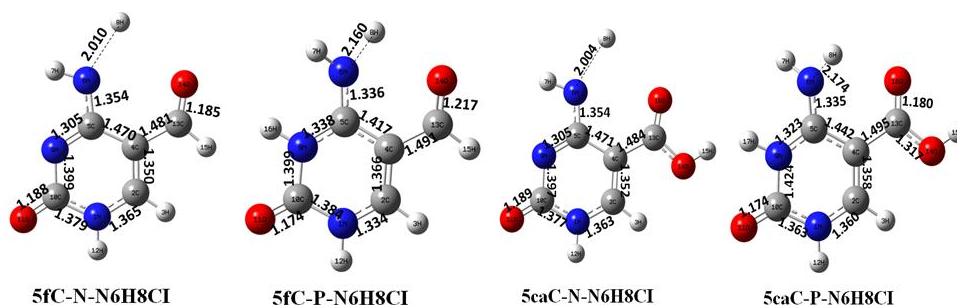

**Figure S4.** The optimized conical intersections of H8 atom dissociated from N6 of 5fC-N, 5fC-P, 5caC-N and 5caC-P. Bond lengths are in Å.

**Table S2.** The single point energies of the conical intersections for hydrogen transfer in triplet state of 5fC-N and 5fC-P at CASPT2//CAS(14,10)/6-31G(d) level. Energies are in kcal/mol.

| Structure     | Vacuum<br>Relative Energy<br>(kcal/mol) |
|---------------|-----------------------------------------|
| 5fC-N-N6H8CI  | 115.80                                  |
| 5fC-P-N6H8CI  | 118.47                                  |
| 5caC-N-N6H8CI | 115.36                                  |
| 5caC-P-N6H8CI | 138.76                                  |

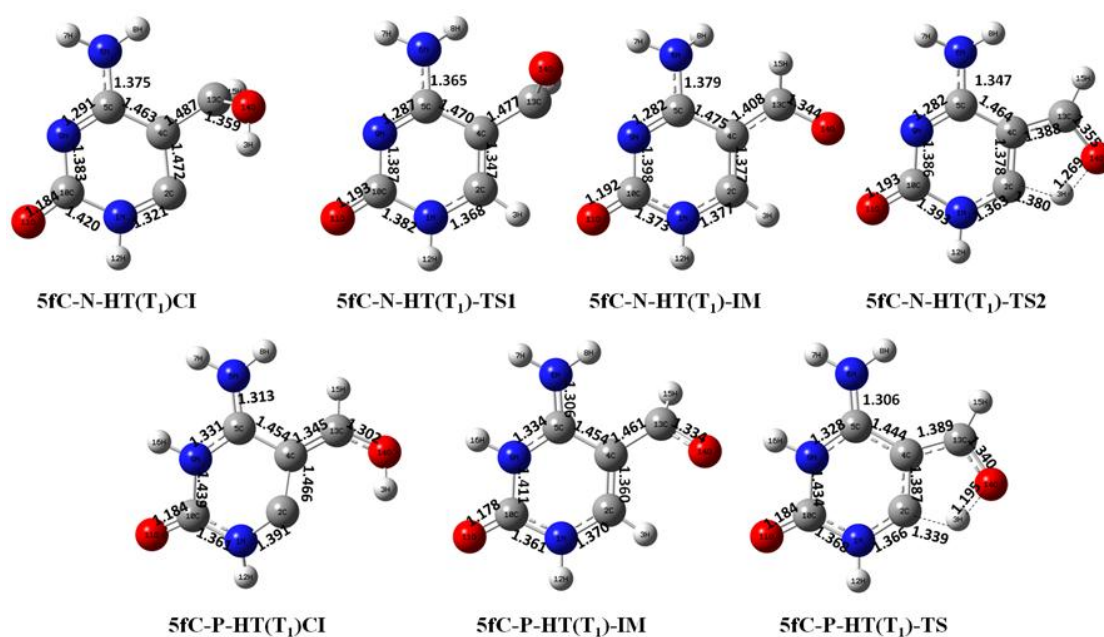

**Figure S5.** The optimized structures of the conical intersections, intermediates and transition states for hydrogen transfer in triplet state of 5fC-N and 5fC-P at CAS(8,7)/6-31G(d) level. Bond lengths are in Å.

**Table S3.** The single point energies of the conical intersections, intermediates and transition states for hydrogen transfer in triplet state of 5fC-N and 5fC-P at CASPT2//CAS(14,10)/6-31G(d) level and CASPT2//CAS(14,10)/6-31G(d)/PCM level for vacuum and PCM model, respectively. Energies are in kcal/mol.

| Structure                     | Vacuum<br>Relative Energy<br>(kcal/mol) | PCM<br>Relative Energy<br>(kcal/mol) |
|-------------------------------|-----------------------------------------|--------------------------------------|
| 5fC-N-HT(T <sub>1</sub> )CI   | 118.33                                  | 114.26                               |
| 5fC-N-HT(T <sub>1</sub> )-TS1 | 92.91                                   | 81.77                                |
| 5fC-N-HT(T <sub>1</sub> )-IM  | 82.09                                   | 71.53                                |
| 5fC-N-HT(T <sub>1</sub> )-TS2 | 114.20                                  | 100.36                               |
| 5fC-P-HT(T <sub>1</sub> )CI   | 88.77                                   | 82.12                                |
| 5fC-P-HT(T <sub>1</sub> )-IM  | 78.03                                   | 72.35                                |
| 5fC-P-HT(T <sub>1</sub> )-TS  | 107.39                                  | 104.99                               |
